# Supplementary material for: Do DEEPER ROOTING 1 Homologs Regulate the Lateral Root Slope Angle in Cucumber (Cucumis sativus)?
Source: MDPI journal article supplement (doi:10.3390/ijms25041975), 2024-02-06
Supplement: s1 [file s1]

## Supplementary Materials

# Do DEEPER ROOTING 1 homologs regulate the lateral root slope angle in cucumber (*Cucumis sativus*)?

Alexey S. Kiryushkin, Elena L. Ilina, Tatyana Y. Kiikova, Katharina Pawlowski and Kirill N. Demchenko

The following Supplementary Material is available for this article:

|  |  |  |  |  |  |  |  |  |  |  |  |  |  |  |  |  |  |  |  |  |  |  |  |  |  |  |  |  |  |  |  |  |  |  |  |  |  |  |  |  |  |  |  |  |  |  |  |  |  |  |  |  |  |  |  |  |  |  |  |  |  |  |  |  |  |  |  |  |  |  |  |  |  |  |  |  |  |  |  |  |  |  |  |  |  |  |  |  |  |  |  |  |  |  |  |  |  |  |  |  |  |  |  |  |  |  |  |  |  |  |  |  |  |  |  |  |  |  |  |  |  |  |  |  |  |  |  |  |  |  |  |  |  |  |  |  |  |  |  |  |  |  |  |  |  |  |  |  |  |  |  |  |  |  |  |  |  |  |  |  |  |  |  |  |  |  |  |  |  |  |  |  |  |  |  |  |  |  |  |  |  |  |  |  |  |  |  |  |  |  |  |  |  |  |  |  |  |  |  |  |  |  |  |  |  |  |  |  |  |  |  |  |  |  |  |  |  |  |  |  |  |  |  |  |  |  |  |  |  |  |  |  |  |  |  |  |  |  |  |  |  |  |  |  |  |  |  |  |  |  |  |  |  |  |  |  |  |  |  |  |  |  |  |  |  |  |  |  |  |  |  |  |  |  |  |  |  |  |  |  |  |  |  |  |  |  |  |  |  |  |  |  |  |  |  |  |  |  |  |  |  |  |  |  |  |  |  |  |  |  |  |  |  |  |  |  |  |  |  |  |  |  |  |  |  |  |  |  |  |  |  |  |  |  |  |  |  |  |  |  |  |  |  |  |  |  |  |  |  |  |  |  |  |  |  |  |  |  |  |  |  |  |  |  |  |  |  |  |  |  |  |  |  |  |  |  |  |  |  |  |  |  |  |  |  |  |  |  |  |  |  |  |  |  |  |  |  |  |  |  |  |  |  |  |  |  |  |  |  |  |  |  |  |  |  |  |  |  |  |  |  |  |  |  |  |  |  |  |  |  |  |  |  |  |  |  |  |  |  |  |  |  |  |  |  |  |  |  |  |  |  |  |  |  |  |  |  |  |  |  |  |  |  |  |  |  |  |  |  |  |  |  |  |  |  |  |  |  |  |  |  |  |  |  |  |  |  |  |  |  |  |  |  |  |  |  |  |  |  |  |  |  |  |  |  |  |  |  |  |  |  |  |  |  |  |  |  |  |  |  |  |  |  |  |  |  |  |  |  |  |  |  |  |  |  |  |  |  |  |  |  |  |  |  |  |  |  |  |  |  |  |  |  |  |  |  |  |  |  |  |  |  |  |  |  |  |  |  |  |  |  |  |  |  |  |  |  |  |  |  |  |  |  |  |  |  |  |  |  |  |  |  |  |  |  |  |  |  |  |  |  |  |  |  |  |  |  |  |  |  |  |  |  |  |  |  |  |  |  |  |  |  |  |  |  |  |  |  |  |  |  |  |  |  |  |  |  |  |  |  |  |  |  |  |  |  |  |  |  |  |  |  |  |  |  |  |  |  |  |  |  |  |  |  |  |  |  |  |  |  |  |  |  |  |  |  |  |  |  |  |  |  |  |  |  |  |  |  |  |  |  |  |  |  |  |  |  |  |  |  |  |  |  |  |  |  |  |  |  |  |  |  |  |  |  |  |  |  |  |  |  |  |  |  |  |  |  |  |  |  |  |  |  |  |  |  |  |  |  |  |  |  |  |  |  |  |  |  |  |  |  |  |  |  |  |  |  |  |  |  |  |  |  |  |  |  |  |  |  |  |  |  |  |  |  |  |  |  |  |  |  |  |  |  |  |  |  |  |  |  |  |  |  |  |  |  |  |  |  |  |  |  |  |  |  |  |  |  |  |  |  |  |  |  |  |  |  |  |  |  |  |  |  |  |  |  |  |  |  |  |  |  |  |  |  |  |  |  |  |  |  |  |  |  |  |  |  |  |  |  |  |  |  |  |  |  |  |  |  |  |  |  |  |  |  |  |  |  |  |  |  |  |  |  |  |  |  |  |  |  |  |  |  |  |  |  |  |  |  |  |  |  |  |  |  |  |  |  |  |  |  |  |  |  |  |  |  |  |  |  |  |  |  |  |  |  |  |  |  |  |  |  |  |  |  |  |  |  |  |  |  |  |  |  |  |  |  |  |  |  |  |  |  |  |  |  |  |  |  |  |  |  |  |  |  |  |  |  |  |  |  |  |  |  |  |  |  |  |  |  |  |  |  |  |  |  |  |  |  |  |  |  |  |  |  |  |  |  |  |  |  |  |  |  |  |  |  |  |  |  |  |  |  |  |  |  |  |  |  |  |  |  |  |  |  |  |  |  |  |  |  |  |  |  |  |  |  |  |  |  |  |  |  |  |  |  |  |  |  |  |  |  |  |  |  |  |  |  |  |  |  |  |  |  |  |  |  |  |  |  |  |  |  |  |  |  |  |  |  |  |  |  |  |  |  |  |  |  |  |  |  |  |  |  |  |  |  |  |  |  |  |  |  |  |  |  |  |  |  |  |  |  |  |  |  |  |  |  |  |  |  |  |  |  |  |  |  |  |  |  |  |  |  |  |  |  |  |  |  |  |  |  |  |  |  |  |  |  |  |  |  |  |  |  |  |  |  |  |  |  |  |  |  |  |  |  |  |  |  |  |  |  |  |  |  |  |  |  |  |  |  |  |  |  |  |  |  |  |  |  |  |  |  |  |  |  |  |  |  |  |  |  |  |  |  |  |  |  |  |  |  |  |  |  |  |  |  |  |  |  |  |  |  |  |  |  |  |  |  |  |  |  |  |  |  |  |  |  |  |  |  |  |  |  |  |  |  |  |  |  |  |  |  |  |  |  |  |  |  |  |  |  |  |  |  |  |  |  |  |  |  |  |  |  |  |  |  |  |  |  |  |  |  |  |  |  |  |  |  |  |  |  |  |  |  |  |  |  |  |  |  |  |  |  |  |  |  |  |  |  |  |  |  |  |  |  |  |  |  |  |  |  |  |  |  |  |  |  |  |  |  |  |  |  |  |  |  |  |  |  |  |  |  |  |  |  |  |  |  |  |  |  |  |  |  |  |  |  |  |  |  |  |  |  |  |  |  |  |  |  |  |  |  |  |  |  |  |  |  |  |  |  |  |  |  |  |  |  |  |  |  |  |  |  |  |  |  |  |  |  |  |  |  |  |  |  |  |  |  |  |  |  |  |  |  |  |  |  |  |  |  |  |  |  |  |  |  |  |  |  |  |  |  |  |  |  |  |  |  |  |  |  |  |  |  |  |  |  |  |  |  |  |  |  |  |  |  |  |  |  |  |  |  |  |  |  |  |  |  |  |  |  |  |  |  |  |  |  |  |  |  |  |  |  |  |  |  |  |  |  |  |  |  |  |  |  |  |  |  |  |  |  |  |  |  |  |  |  |  |  |  |  |  |  |  |  |  |  |  |  |  |  |  |  |  |  |  |  |  |  |  |  |  |  |  |  |  |  |  |  |  |  |  |  |  |  |  |  |  |  |  |  |  |  |  |  |  |  |  |  |  |  |  |  |  |  |  |  |  |  |  |  |  |  |  |  |  |  |  |  |  |  |  |  |  |  |  |  |  |  |  |  |  |  |  |  |  |  |  |  |  |  |  |  |  |  |  |  |  |  |  |  |  |  |  |  |  |  |  |  |  |  |  |  |  |  |  |  |  |  |  |  |  |  |  |  |  |  |  |  |  |  |  |  |  |  |  |  |  |  |  |  |  |  |  |  |  |  |  |  |  |  |  |  |  |  |  |  |  |  |  |  |  |  |  |  |  |  |  |  |  |  |  |  |  |  |  |  |  |
|--|--|--|--|--|--|--|--|--|--|--|--|--|--|--|--|--|--|--|--|--|--|--|--|--|--|--|--|--|--|--|--|--|--|--|--|--|--|--|--|--|--|--|--|--|--|--|--|--|--|--|--|--|--|--|--|--|--|--|--|--|--|--|--|--|--|--|--|--|--|--|--|--|--|--|--|--|--|--|--|--|--|--|--|--|--|--|--|--|--|--|--|--|--|--|--|--|--|--|--|--|--|--|--|--|--|--|--|--|--|--|--|--|--|--|--|--|--|--|--|--|--|--|--|--|--|--|--|--|--|--|--|--|--|--|--|--|--|--|--|--|--|--|--|--|--|--|--|--|--|--|--|--|--|--|--|--|--|--|--|--|--|--|--|--|--|--|--|--|--|--|--|--|--|--|--|--|--|--|--|--|--|--|--|--|--|--|--|--|--|--|--|--|--|--|--|--|--|--|--|--|--|--|--|--|--|--|--|--|--|--|--|--|--|--|--|--|--|--|--|--|--|--|--|--|--|--|--|--|--|--|--|--|--|--|--|--|--|--|--|--|--|--|--|--|--|--|--|--|--|--|--|--|--|--|--|--|--|--|--|--|--|--|--|--|--|--|--|--|--|--|--|--|--|--|--|--|--|--|--|--|--|--|--|--|--|--|--|--|--|--|--|--|--|--|--|--|--|--|--|--|--|--|--|--|--|--|--|--|--|--|--|--|--|--|--|--|--|--|--|--|--|--|--|--|--|--|--|--|--|--|--|--|--|--|--|--|--|--|--|--|--|--|--|--|--|--|--|--|--|--|--|--|--|--|--|--|--|--|--|--|--|--|--|--|--|--|--|--|--|--|--|--|--|--|--|--|--|--|--|--|--|--|--|--|--|--|--|--|--|--|--|--|--|--|--|--|--|--|--|--|--|--|--|--|--|--|--|--|--|--|--|--|--|--|--|--|--|--|--|--|--|--|--|--|--|--|--|--|--|--|--|--|--|--|--|--|--|--|--|--|--|--|--|--|--|--|--|--|--|--|--|--|--|--|--|--|--|--|--|--|--|--|--|--|--|--|--|--|--|--|--|--|--|--|--|--|--|--|--|--|--|--|--|--|--|--|--|--|--|--|--|--|--|--|--|--|--|--|--|--|--|--|--|--|--|--|--|--|--|--|--|--|--|--|--|--|--|--|--|--|--|--|--|--|--|--|--|--|--|--|--|--|--|--|--|--|--|--|--|--|--|--|--|--|--|--|--|--|--|--|--|--|--|--|--|--|--|--|--|--|--|--|--|--|--|--|--|--|--|--|--|--|--|--|--|--|--|--|--|--|--|--|--|--|--|--|--|--|--|--|--|--|--|--|--|--|--|--|--|--|--|--|--|--|--|--|--|--|--|--|--|--|--|--|--|--|--|--|--|--|--|--|--|--|--|--|--|--|--|--|--|--|--|--|--|--|--|--|--|--|--|--|--|--|--|--|--|--|--|--|--|--|--|--|--|--|--|--|--|--|--|--|--|--|--|--|--|--|--|--|--|--|--|--|--|--|--|--|--|--|--|--|--|--|--|--|--|--|--|--|--|--|--|--|--|--|--|--|--|--|--|--|--|--|--|--|--|--|--|--|--|--|--|--|--|--|--|--|--|--|--|--|--|--|--|--|--|--|--|--|--|--|--|--|--|--|--|--|--|--|--|--|--|--|--|--|--|--|--|--|--|--|--|--|--|--|--|--|--|--|--|--|--|--|--|--|--|--|--|--|--|--|--|--|--|--|--|--|--|--|--|--|--|--|--|--|--|--|--|--|--|--|--|--|--|--|--|--|--|--|--|--|--|--|--|--|--|--|--|--|--|--|--|--|--|--|--|--|--|--|--|--|--|--|--|--|--|--|--|--|--|--|--|--|--|--|--|--|--|--|--|--|--|--|--|--|--|--|--|--|--|--|--|--|--|--|--|--|--|--|--|--|--|--|--|--|--|--|--|--|--|--|--|--|--|--|--|--|--|--|--|--|--|--|--|--|--|--|--|--|--|--|--|--|--|--|--|--|--|--|--|--|--|--|--|--|--|--|--|--|--|--|--|--|--|--|--|--|--|--|--|--|--|--|--|--|--|--|--|--|--|--|--|--|--|--|--|--|--|--|--|--|--|--|--|--|--|--|--|--|--|--|--|--|--|--|--|--|--|--|--|--|--|--|--|--|--|--|--|--|--|--|--|--|--|--|--|--|--|--|--|--|--|--|--|--|--|--|--|--|--|--|--|--|--|--|--|--|--|--|--|--|--|--|--|--|--|--|--|--|--|--|--|--|--|--|--|--|--|--|--|--|--|--|--|--|--|--|--|--|--|--|--|--|--|--|--|--|--|--|--|--|--|--|--|--|--|--|--|--|--|--|--|--|--|--|--|--|--|--|--|--|--|--|--|--|--|--|--|--|--|--|--|--|--|--|--|--|--|--|--|--|--|--|--|--|--|--|--|--|--|--|--|--|--|--|--|--|--|--|--|--|--|--|--|--|--|--|--|--|--|--|--|--|--|--|--|--|--|--|--|--|--|--|--|--|--|--|--|--|--|--|--|--|--|--|--|--|--|--|--|--|--|--|--|--|--|--|--|--|--|--|--|--|--|--|--|--|--|--|--|--|--|--|--|--|--|--|--|--|--|--|--|--|--|--|--|--|--|--|--|--|--|--|--|--|--|--|--|--|--|--|--|--|--|--|--|--|--|--|--|--|--|--|--|--|--|--|--|--|--|--|--|--|--|--|--|--|--|--|--|--|--|--|--|--|--|--|--|--|--|--|--|--|--|--|--|--|--|--|--|--|--|--|--|--|--|--|--|--|--|--|--|--|--|--|--|--|--|--|--|--|--|--|--|--|--|--|--|--|--|--|--|--|--|--|--|--|--|--|--|--|--|--|--|--|--|--|--|--|--|--|--|--|--|--|--|--|--|--|--|--|--|--|--|--|--|--|--|--|--|--|--|--|--|--|--|--|--|--|--|--|--|--|--|--|--|--|--|--|--|--|--|--|--|--|--|--|--|--|--|--|--|--|--|--|--|--|--|--|--|--|--|--|--|--|--|--|--|--|--|--|--|--|--|--|--|--|--|--|--|--|--|--|--|--|--|--|--|--|--|--|--|--|--|--|--|--|--|--|--|--|--|--|--|--|--|--|--|--|--|--|--|--|--|--|--|--|--|--|--|--|--|--|--|--|--|--|--|--|--|--|--|--|--|--|--|--|--|--|--|--|--|--|--|--|--|--|--|--|--|--|--|--|--|--|--|--|--|--|--|--|--|--|--|--|--|--|--|--|--|--|--|--|--|--|--|--|--|--|--|--|--|--|--|--|--|--|--|--|--|--|--|--|--|--|--|--|--|--|--|--|--|--|--|--|--|--|--|--|--|--|--|--|--|--|--|--|--|--|--|--|--|--|--|--|--|--|--|--|--|--|--|--|--|--|--|--|--|--|--|--|--|--|--|--|--|--|--|--|--|--|--|--|--|--|--|--|--|--|--|--|--|--|--|--|--|--|--|--|--|--|--|--|--|--|--|--|--|--|--|--|--|--|--|--|--|--|--|--|--|--|--|--|--|--|--|--|--|--|--|--|--|--|--|--|--|--|--|--|--|--|--|--|--|--|--|--|--|--|--|--|--|--|--|--|--|--|--|--|--|--|--|--|--|--|--|--|--|--|--|--|--|--|--|--|--|--|--|--|--|--|--|--|--|--|--|--|--|--|--|--|--|--|--|--|--|--|--|--|--|--|--|--|--|--|--|--|--|--|--|--|--|--|--|--|--|--|--|
|  |  |  |  |  |  |  |  |  |  |  |  |  |  |  |  |  |  |  |  |  |  |  |  |  |  |  |  |  |  |  |  |  |  |  |  |  |  |  |  |  |  |  |  |  |  |  |  |  |  |  |  |  |  |  |  |  |  |  |  |  |  |  |  |  |  |  |  |  |  |  |  |  |  |  |  |  |  |  |  |  |  |  |  |  |  |  |  |  |  |  |  |  |  |  |  |  |  |  |  |  |  |  |  |  |  |  |  |  |  |  |  |  |  |  |  |  |  |  |  |  |  |  |  |  |  |  |  |  |  |  |  |  |  |  |  |  |  |  |  |  |  |  |  |  |  |  |  |  |  |  |  |  |  |  |  |  |  |  |  |  |  |  |  |  |  |  |  |  |  |  |  |  |  |  |  |  |  |  |  |  |  |  |  |  |  |  |  |  |  |  |  |  |  |  |  |  |  |  |  |  |  |  |  |  |  |  |  |  |  |  |  |  |  |  |  |  |  |  |  |  |  |  |  |  |  |  |  |  |  |  |  |  |  |  |  |  |  |  |  |  |  |  |  |  |  |  |  |  |  |  |  |  |  |  |  |  |  |  |  |  |  |  |  |  |  |  |  |  |  |  |  |  |  |  |  |  |  |  |  |  |  |  |  |  |  |  |  |  |  |  |  |  |  |  |  |  |  |  |  |  |  |  |  |  |  |  |  |  |  |  |  |  |  |  |  |  |  |  |  |  |  |  |  |  |  |  |  |  |  |  |  |  |  |  |  |  |  |  |  |  |  |  |  |  |  |  |  |  |  |  |  |  |  |  |  |  |  |  |  |  |  |  |  |  |  |  |  |  |  |  |  |  |  |  |  |  |  |  |  |  |  |  |  |  |  |  |  |  |  |  |  |  |  |  |  |  |  |  |  |  |  |  |  |  |  |  |  |  |  |  |  |  |  |  |  |  |  |  |  |  |  |  |  |  |  |  |  |  |  |  |  |  |  |  |  |  |  |  |  |  |  |  |  |  |  |  |  |  |  |  |  |  |  |  |  |  |  |  |  |  |  |  |  |  |  |  |  |  |  |  |  |  |  |  |  |  |  |  |  |  |  |  |  |  |  |  |  |  |  |  |  |  |  |  |  |  |  |  |  |  |  |  |  |  |  |  |  |  |  |  |  |  |  |  |  |  |  |  |  |  |  |  |  |  |  |  |  |  |  |  |  |  |  |  |  |  |  |  |  |  |  |  |  |  |  |  |  |  |  |  |  |  |  |  |  |  |  |  |  |  |  |  |  |  |  |  |  |  |  |  |  |  |  |  |  |  |  |  |  |  |  |  |  |  |  |  |  |  |  |  |  |  |  |  |  |  |  |  |  |  |  |  |  |  |  |  |  |  |  |  |  |  |  |  |  |  |  |  |  |  |  |  |  |  |  |  |  |  |  |  |  |  |  |  |  |  |  |  |  |  |  |  |  |  |  |  |  |  |  |  |  |  |  |  |  |  |  |  |  |  |  |  |  |  |  |  |  |  |  |  |  |  |  |  |  |  |  |  |  |  |  |  |  |  |  |  |  |  |  |  |  |  |  |  |  |  |  |  |  |  |  |  |  |  |  |  |  |  |  |  |  |  |  |  |  |  |  |  |  |  |  |  |  |  |  |  |  |  |  |  |  |  |  |  |  |  |  |  |  |  |  |  |  |  |  |  |  |  |  |  |  |  |  |  |  |  |  |  |  |  |  |  |  |  |  |  |  |  |  |  |  |  |  |  |  |  |  |  |  |  |  |  |  |  |  |  |  |  |  |  |  |  |  |  |  |  |  |  |  |  |  |  |  |  |  |  |  |  |  |  |  |  |  |  |  |  |  |  |  |  |  |  |  |  |  |  |  |  |  |  |  |  |  |  |  |  |  |  |  |  |  |  |  |  |  |  |  |  |  |  |  |  |  |  |  |  |  |  |  |  |  |  |  |  |  |  |  |  |  |  |  |  |  |  |  |  |  |  |  |  |  |  |  |  |  |  |  |  |  |  |  |  |  |  |  |  |  |  |  |  |  |  |  |  |  |  |  |  |  |  |  |  |  |  |  |  |  |  |  |  |  |  |  |  |  |  |  |  |  |  |  |  |  |  |  |  |  |  |  |  |  |  |  |  |  |  |  |  |  |  |  |  |  |  |  |  |  |  |  |  |  |  |  |  |  |  |  |  |  |  |  |  |  |  |  |  |  |  |  |  |  |  |  |  |  |  |  |  |  |  |  |  |  |  |  |  |  |  |  |  |  |  |  |  |  |  |  |  |  |  |  |  |  |  |  |  |  |  |  |  |  |  |  |  |  |  |  |  |  |  |  |  |  |  |  |  |  |  |  |  |  |  |  |  |  |  |  |  |  |  |  |  |  |  |  |  |  |  |  |  |  |  |  |  |  |  |  |  |  |  |  |  |  |  |  |  |  |  |  |  |  |  |  |  |  |  |  |  |  |  |  |  |  |  |  |  |  |  |  |  |  |  |  |  |  |  |  |  |  |  |  |  |  |  |  |  |  |  |  |  |  |  |  |  |  |  |  |  |  |  |  |  |  |  |  |  |  |  |  |  |  |  |  |  |  |  |  |  |  |  |  |  |  |  |  |  |  |  |  |  |  |  |  |  |  |  |  |  |  |  |  |  |  |  |  |  |  |  |  |  |  |  |  |  |  |  |  |  |  |  |  |  |  |  |  |  |  |  |  |  |  |  |  |  |  |  |  |  |  |  |  |  |  |  |  |  |  |  |  |  |  |  |  |  |  |  |  |  |  |  |  |  |  |  |  |  |  |  |  |  |  |  |  |  |  |  |  |  |  |  |  |  |  |  |  |  |  |  |  |  |  |  |  |  |  |  |  |  |  |  |  |  |  |  |  |  |  |  |  |  |  |  |  |  |  |  |  |  |  |  |  |  |  |  |  |  |  |  |  |  |  |  |  |  |  |  |  |  |  |  |  |  |  |  |  |  |  |  |  |  |  |  |  |  |  |  |  |  |  |  |  |  |  |  |  |  |  |  |  |  |  |  |  |  |  |  |  |  |  |  |  |  |  |  |  |  |  |  |  |  |  |  |  |  |  |  |  |  |  |  |  |  |  |  |  |  |  |  |  |  |  |  |  |  |  |  |  |  |  |  |  |  |  |  |  |  |  |  |  |  |  |  |  |  |  |  |  |  |  |  |  |  |  |  |  |  |  |  |  |  |  |  |  |  |  |  |  |  |  |  |  |  |  |  |  |  |  |  |  |  |  |  |  |  |  |  |  |  |  |  |  |  |  |  |  |  |  |  |  |  |  |  |  |  |  |  |  |  |  |  |  |  |  |  |  |  |  |  |  |  |  |  |  |  |  |  |  |  |  |  |  |  |  |  |  |  |  |  |  |  |  |  |  |  |  |  |  |  |  |  |  |  |  |  |  |  |  |  |  |  |  |  |  |  |  |  |  |  |  |  |  |  |  |  |  |  |  |  |  |  |  |  |  |  |  |  |  |  |  |  |  |  |  |  |  |  |  |  |  |  |  |  |  |  |  |  |  |  |  |  |  |  |  |  |  |  |  |  |  |  |  |  |  |  |  |  |  |  |  |  |  |  |  |  |  |  |  |  |  |  |  |  |  |  |  |  |  |  |  |  |  |  |  |  |  |  |  |  |  |  |  |  |  |  |  |  |  |  |  |  |  |  |  |  |  |  |  |  |  |  |  |  |  |  |  |  |  |  |  |  |  |  |  |  |  |  |  |  |  |  |  |  |  |  |  |  |  |  |  |  |  |  |  |  |  |  |  |  |  |
|--|--|--|--|--|--|--|--|--|--|--|--|--|--|--|--|--|--|--|--|--|--|--|--|--|--|--|--|--|--|--|--|--|--|--|--|--|--|--|--|--|--|--|--|--|--|--|--|--|--|--|--|--|--|--|--|--|--|--|--|--|--|--|--|--|--|--|--|--|--|--|--|--|--|--|--|--|--|--|--|--|--|--|--|--|--|--|--|--|--|--|--|--|--|--|--|--|--|--|--|--|--|--|--|--|--|--|--|--|--|--|--|--|--|--|--|--|--|--|--|--|--|--|--|--|--|--|--|--|--|--|--|--|--|--|--|--|--|--|--|--|--|--|--|--|--|--|--|--|--|--|--|--|--|--|--|--|--|--|--|--|--|--|--|--|--|--|--|--|--|--|--|--|--|--|--|--|--|--|--|--|--|--|--|--|--|--|--|--|--|--|--|--|--|--|--|--|--|--|--|--|--|--|--|--|--|--|--|--|--|--|--|--|--|--|--|--|--|--|--|--|--|--|--|--|--|--|--|--|--|--|--|--|--|--|--|--|--|--|--|--|--|--|--|--|--|--|--|--|--|--|--|--|--|--|--|--|--|--|--|--|--|--|--|--|--|--|--|--|--|--|--|--|--|--|--|--|--|--|--|--|--|--|--|--|--|--|--|--|--|--|--|--|--|--|--|--|--|--|--|--|--|--|--|--|--|--|--|--|--|--|--|--|--|--|--|--|--|--|--|--|--|--|--|--|--|--|--|--|--|--|--|--|--|--|--|--|--|--|--|--|--|--|--|--|--|--|--|--|--|--|--|--|--|--|--|--|--|--|--|--|--|--|--|--|--|--|--|--|--|--|--|--|--|--|--|--|--|--|--|--|--|--|--|--|--|--|--|--|--|--|--|--|--|--|--|--|--|--|--|--|--|--|--|--|--|--|--|--|--|--|--|--|--|--|--|--|--|--|--|--|--|--|--|--|--|--|--|--|--|--|--|--|--|--|--|--|--|--|--|--|--|--|--|--|--|--|--|--|--|--|--|--|--|--|--|--|--|--|--|--|--|--|--|--|--|--|--|--|--|--|--|--|--|--|--|--|--|--|--|--|--|--|--|--|--|--|--|--|--|--|--|--|--|--|--|--|--|--|--|--|--|--|--|--|--|--|--|--|--|--|--|--|--|--|--|--|--|--|--|--|--|--|--|--|--|--|--|--|--|--|--|--|--|--|--|--|--|--|--|--|--|--|--|--|--|--|--|--|--|--|--|--|--|--|--|--|--|--|--|--|--|--|--|--|--|--|--|--|--|--|--|--|--|--|--|--|--|--|--|--|--|--|--|--|--|--|--|--|--|--|--|--|--|--|--|--|--|--|--|--|--|--|--|--|--|--|--|--|--|--|--|--|--|--|--|--|--|--|--|--|--|--|--|--|--|--|--|--|--|--|--|--|--|--|--|--|--|--|--|--|--|--|--|--|--|--|--|--|--|--|--|--|--|--|--|--|--|--|--|--|--|--|--|--|--|--|--|--|--|--|--|--|--|--|--|--|--|--|--|--|--|--|--|--|--|--|--|--|--|--|--|--|--|--|--|--|--|--|--|--|--|--|--|--|--|--|--|--|--|--|--|--|--|--|--|--|--|--|--|--|--|--|--|--|--|--|--|--|--|--|--|--|--|--|--|--|--|--|--|--|--|--|--|--|--|--|--|--|--|--|--|--|--|--|--|--|--|--|--|--|--|--|--|--|--|--|--|--|--|--|--|--|--|--|--|--|--|--|--|--|--|--|--|--|--|--|--|--|--|--|--|--|--|--|--|--|--|--|--|--|--|--|--|--|--|--|--|--|--|--|--|--|--|--|--|--|--|--|--|--|--|--|--|--|--|--|--|--|--|--|--|--|--|--|--|--|--|--|--|--|--|--|--|--|--|--|--|--|--|--|--|--|--|--|--|--|--|--|--|--|--|--|--|--|--|--|--|--|--|--|--|--|--|--|--|--|--|--|--|--|--|--|--|--|--|--|--|--|--|--|--|--|--|--|--|--|--|--|--|--|--|--|--|--|--|--|--|--|--|--|--|--|--|--|--|--|--|--|--|--|--|--|--|--|--|--|--|--|--|--|--|--|--|--|--|--|--|--|--|--|--|--|--|--|--|--|--|--|--|--|--|--|--|--|--|--|--|--|--|--|--|--|--|--|--|--|--|--|--|--|--|--|--|--|--|--|--|--|--|--|--|--|--|--|--|--|--|--|--|--|--|--|--|--|--|--|--|--|--|--|--|--|--|--|--|--|--|--|--|--|--|--|--|--|--|--|--|--|--|--|--|--|--|--|--|--|--|--|--|--|--|--|--|--|--|--|--|--|--|--|--|--|--|--|--|--|--|--|--|--|--|--|--|--|--|--|--|--|--|--|--|--|--|--|--|--|--|--|--|--|--|--|--|--|--|--|--|--|--|--|--|--|--|--|--|--|--|--|--|--|--|--|--|--|--|--|--|--|--|--|--|--|--|--|--|--|--|--|--|--|--|--|--|--|--|--|--|--|--|--|--|--|--|--|--|--|--|--|--|--|--|--|--|--|--|--|--|--|--|--|--|--|--|--|--|--|--|--|--|--|--|--|--|--|--|--|--|--|--|--|--|--|--|--|--|--|--|--|--|--|--|--|--|--|--|--|--|--|--|--|--|--|--|--|--|--|--|--|--|--|--|--|--|--|--|--|--|--|--|--|--|--|--|--|--|--|--|--|--|--|--|--|--|--|--|--|--|--|--|--|--|--|--|--|--|--|--|--|--|--|--|--|--|--|--|--|--|--|--|--|--|--|--|--|--|--|--|--|--|--|--|--|--|--|--|--|--|--|--|--|--|--|--|--|--|--|--|--|--|--|--|--|--|--|--|--|--|--|--|--|--|--|--|--|--|--|--|--|--|--|--|--|--|--|--|--|--|--|--|--|--|--|--|--|--|--|--|--|--|--|--|--|--|--|--|--|--|--|--|--|--|--|--|--|--|--|--|--|--|--|--|--|--|--|--|--|--|--|--|--|--|--|--|--|--|--|--|--|--|--|--|--|--|--|--|--|--|--|--|--|--|--|--|--|--|--|--|--|--|--|--|--|--|--|--|--|--|--|--|--|--|--|--|--|--|--|--|--|--|--|--|--|--|--|--|--|--|--|--|--|--|--|--|--|--|--|--|--|--|--|--|--|--|--|--|--|--|--|--|--|--|--|--|--|--|--|--|--|--|--|--|--|--|--|--|--|--|--|--|--|--|--|--|--|--|--|--|--|--|--|--|--|--|--|--|--|--|--|--|--|--|--|--|--|--|--|--|--|--|--|--|--|--|--|--|--|--|--|--|--|--|--|--|--|--|--|--|--|--|--|--|--|--|--|--|--|--|--|--|--|--|--|--|--|--|--|--|--|--|--|--|--|--|--|--|--|--|--|--|--|--|--|--|--|--|--|--|--|--|--|--|--|--|--|--|--|--|--|--|--|--|--|--|--|--|--|--|--|--|--|--|--|--|--|--|--|--|--|--|--|--|--|--|--|--|--|--|--|--|--|--|--|--|--|--|--|--|--|--|--|--|--|--|--|--|--|--|--|--|--|--|--|--|--|--|--|--|--|--|--|--|--|--|--|--|--|--|--|--|--|--|--|--|--|--|--|--|--|--|--|--|--|--|--|--|--|--|--|--|--|--|--|--|--|--|--|--|--|--|--|--|--|--|--|--|--|--|--|--|--|--|--|--|--|--|--|--|--|--|--|--|--|--|--|--|--|--|--|--|--|--|--|--|--|--|--|--|--|--|

**Figure S1.** Alignment of AtqSOR1 (Kitomi et al., 2020) and AtNGR1/AtDRO3/AtLAZY2 (gene ID: AT1G17400.1) proteins. The sequences have 100% identity between each other.

Kitomi, Y., Hanzawa, E., Kuya, N., Inoue, H., Hara, N., Kawai, S., et al. (2020). Root angle modifications by the DRO1 homolog improve rice yields in saline paddy fields. *Proc. Natl. Acad. Sci. USA* 117(35), 21242–21250. doi: 10.1073/pnas.2005911117

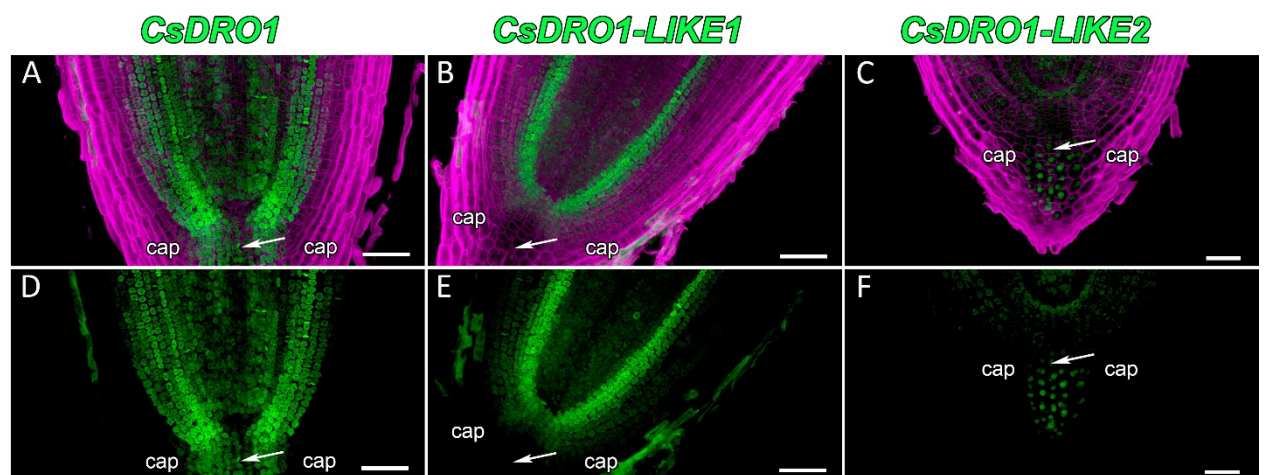

**Figure S2.** Localization of CsDRO1, CsDRO1-LIKE1, and CsDRO1-LIKE2 expression in the root cap of *Cucumis sativus* (*pCsDRO::mNeonGreen-H2B*). Confocal laser scanning microscopy of longitudinal vibratome sections. Expression of CsDRO1 (A,D) was active in the root cap columella (white arrow). (B,E) Activity of *pCsDRO1L1* was not observed in the root cap columella (white arrow). (C,F) Expression of CsDRO1L2 was maintained in the apical part of the root cap columella (white arrow). Green channel, fluorescence of mNeonGreen; magenta channel, SR2200-stained cell walls. Maximum intensity projection of z-series: of 12 optical sections, 8 µm in depth. Scale bars – (A,B,D,E), 100 µm; (C,F), 50 µm.



Figure S3. CsDRO1 (biallelic homozygous mutations)

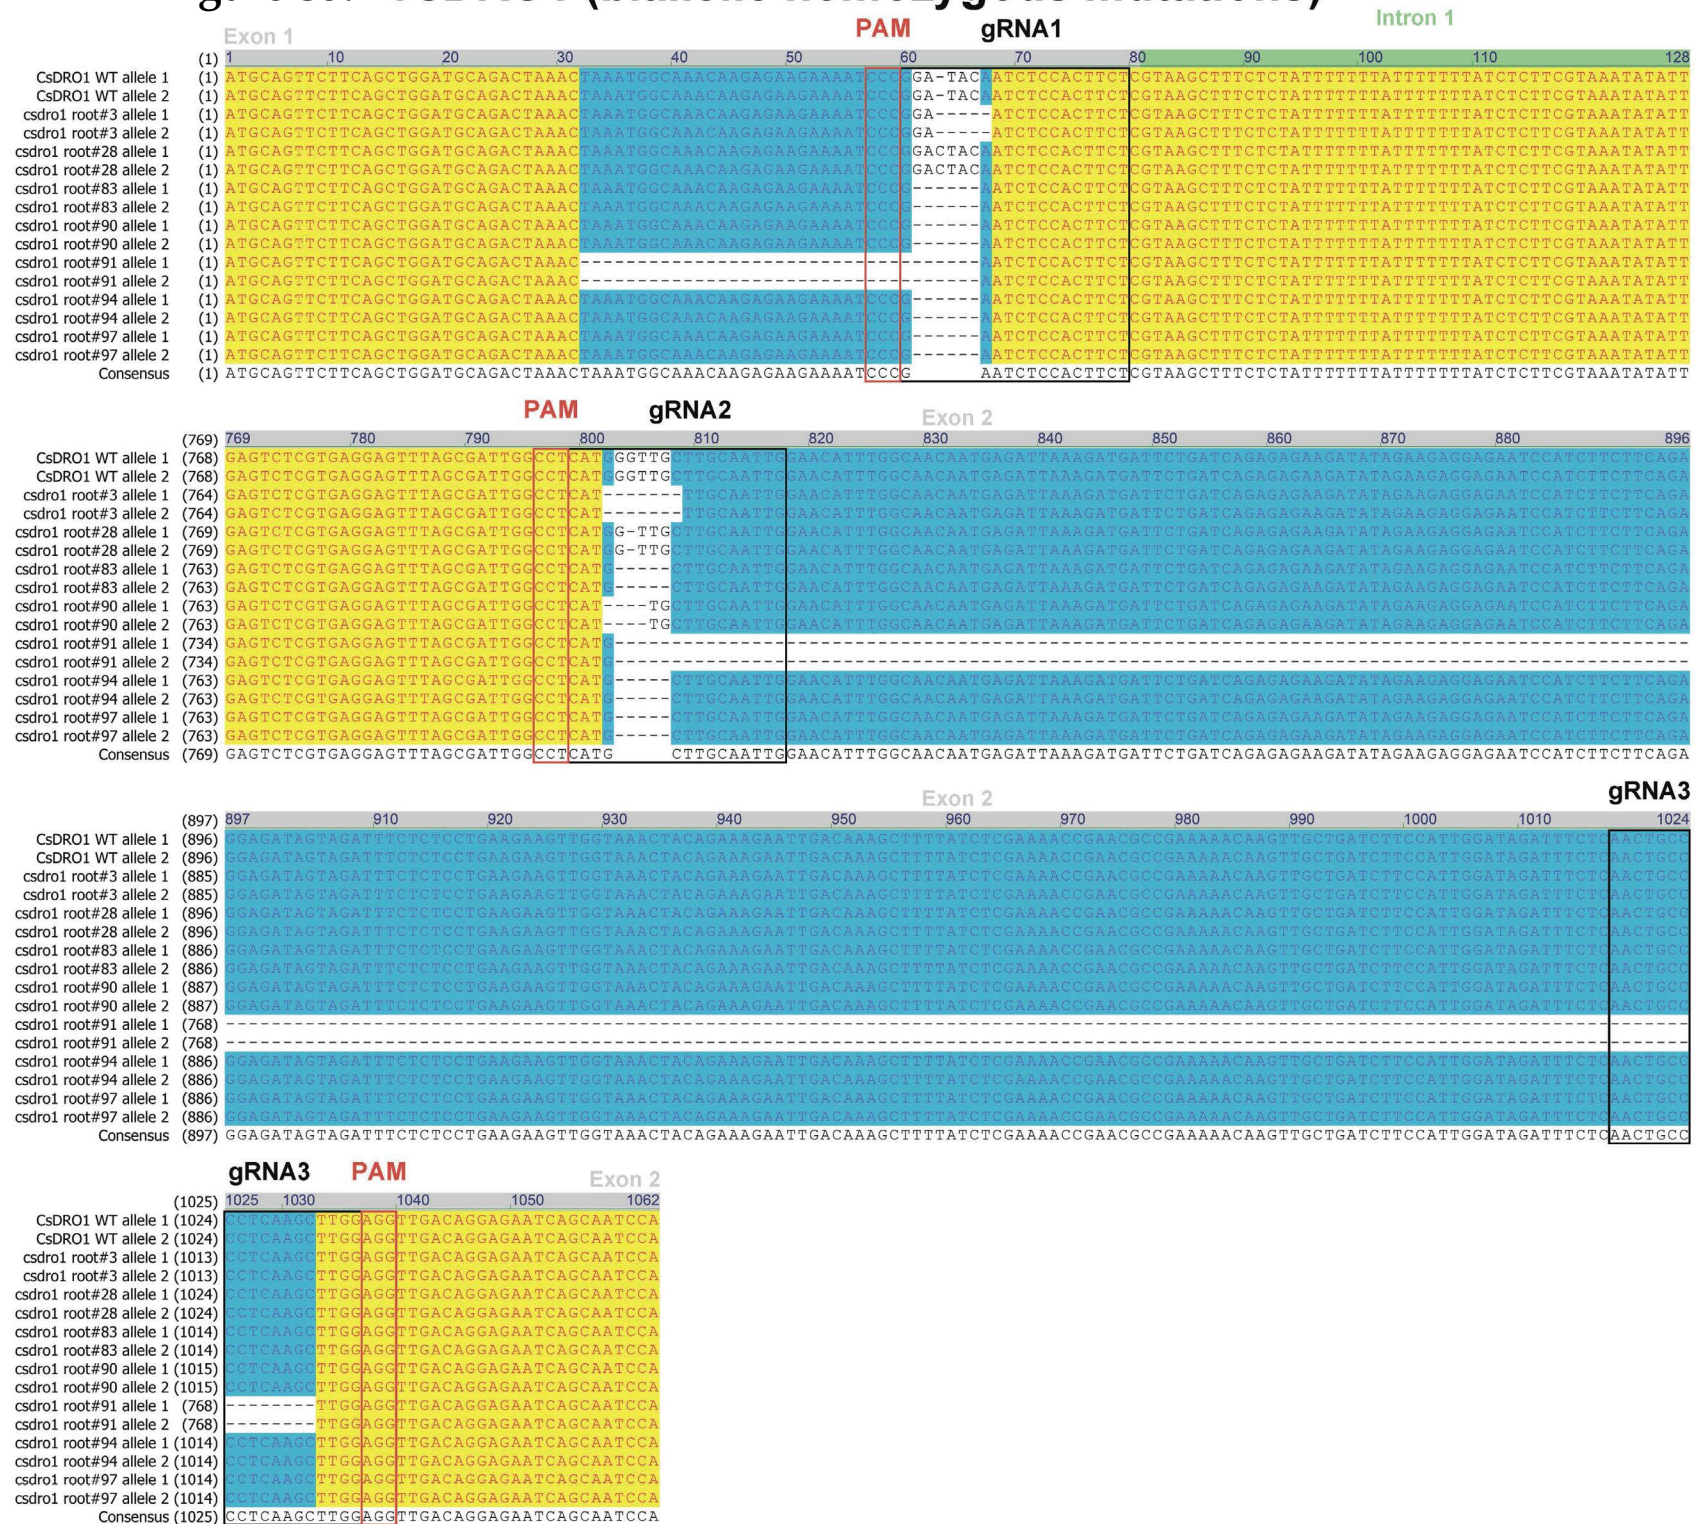



Figure S4. CsDRO1-LIKE1 (biallelic heterozygous mutations)

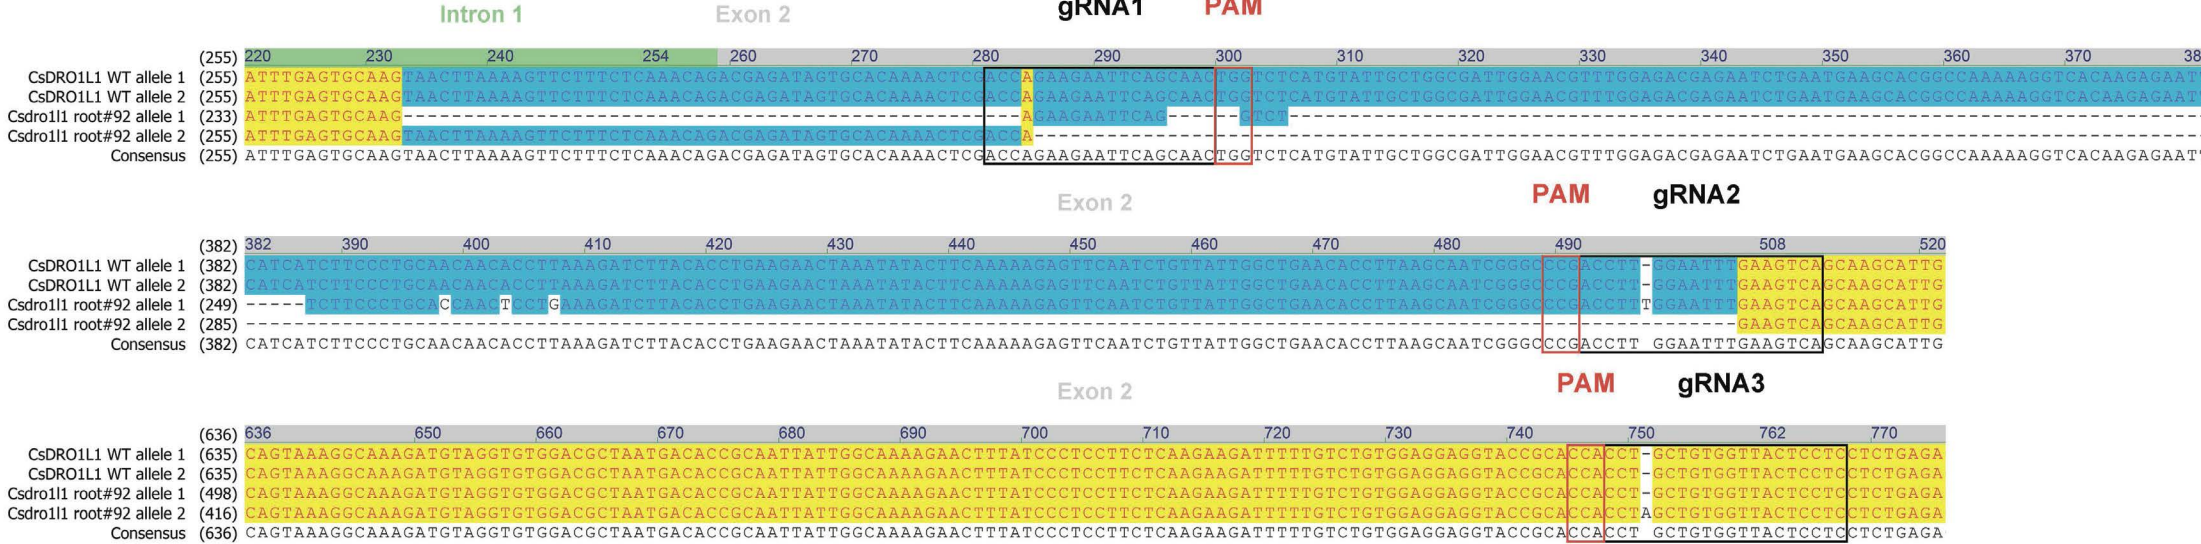



[illegible]



Figure S6. **CsDRO1-LIKE2** (biallelic heterozygous mutations)

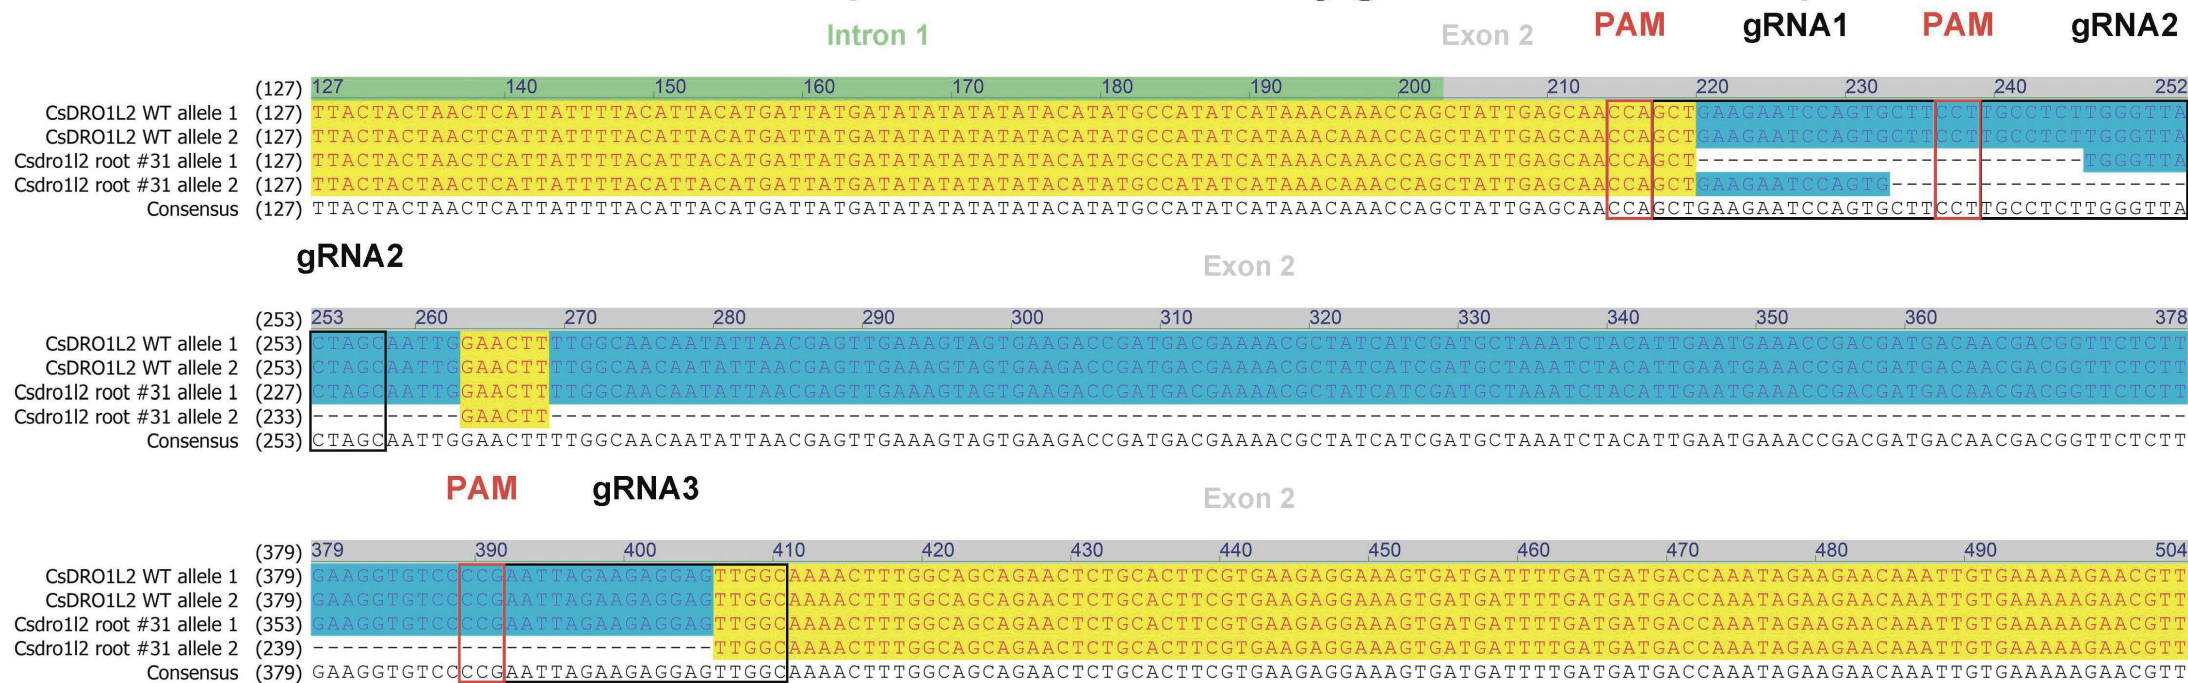



**Figure S7. CsDRO1-LIKE2 (biallelic homozygous mutations)**

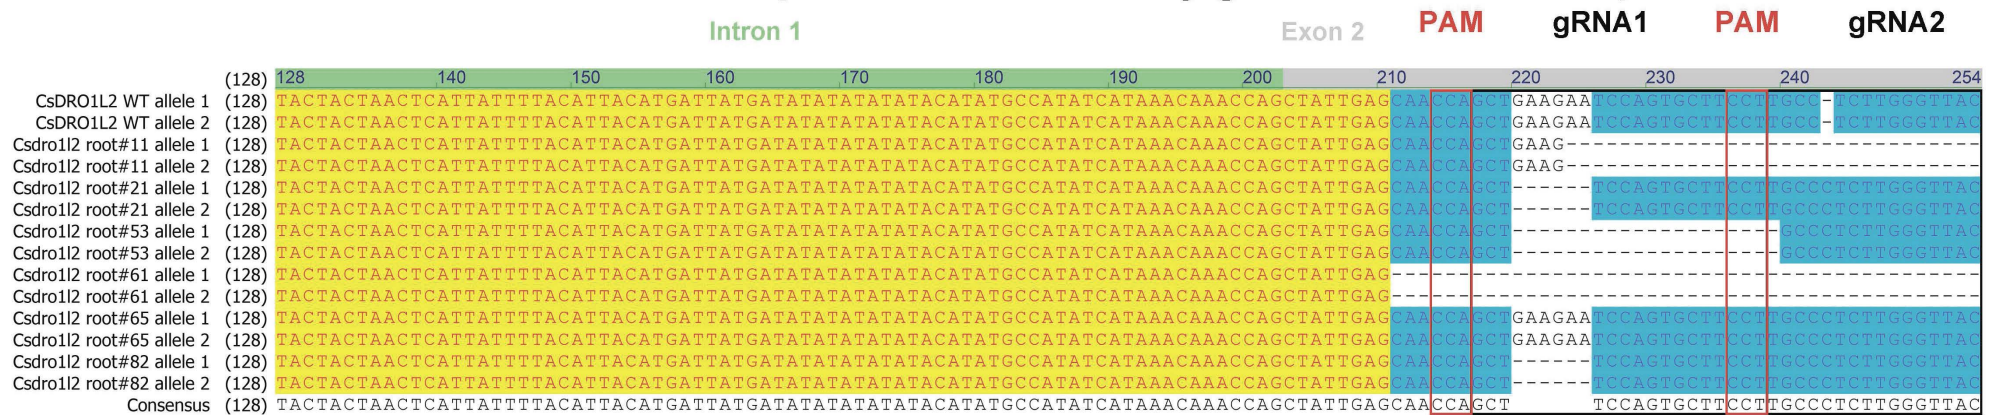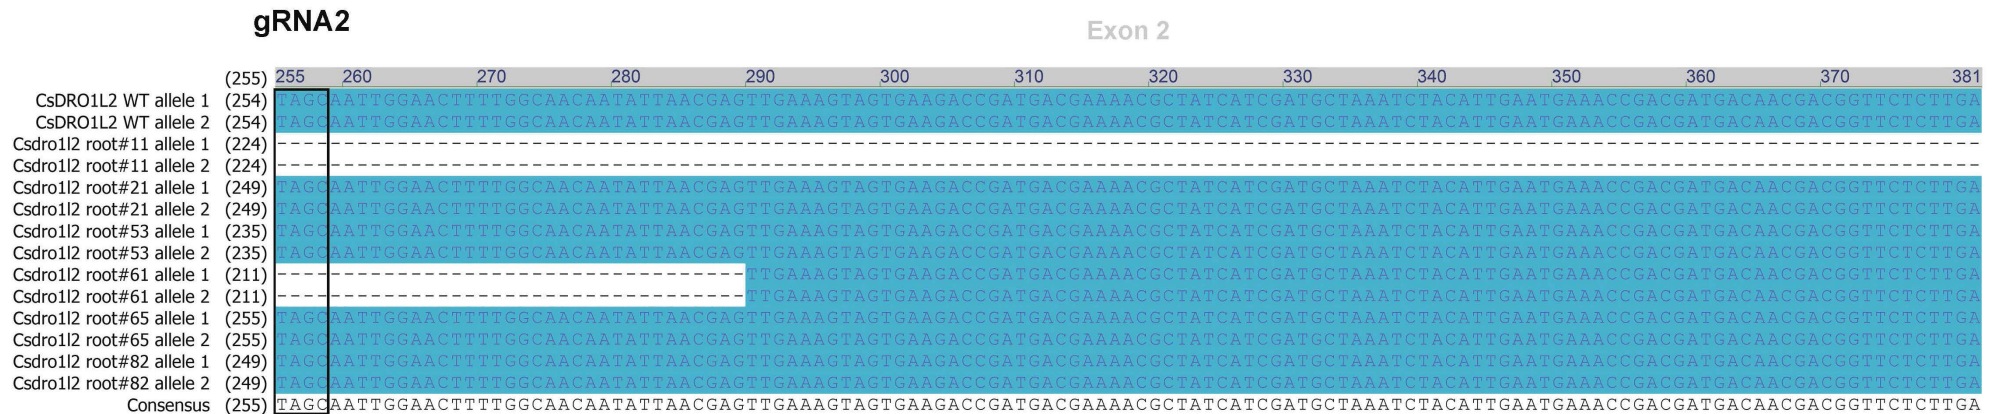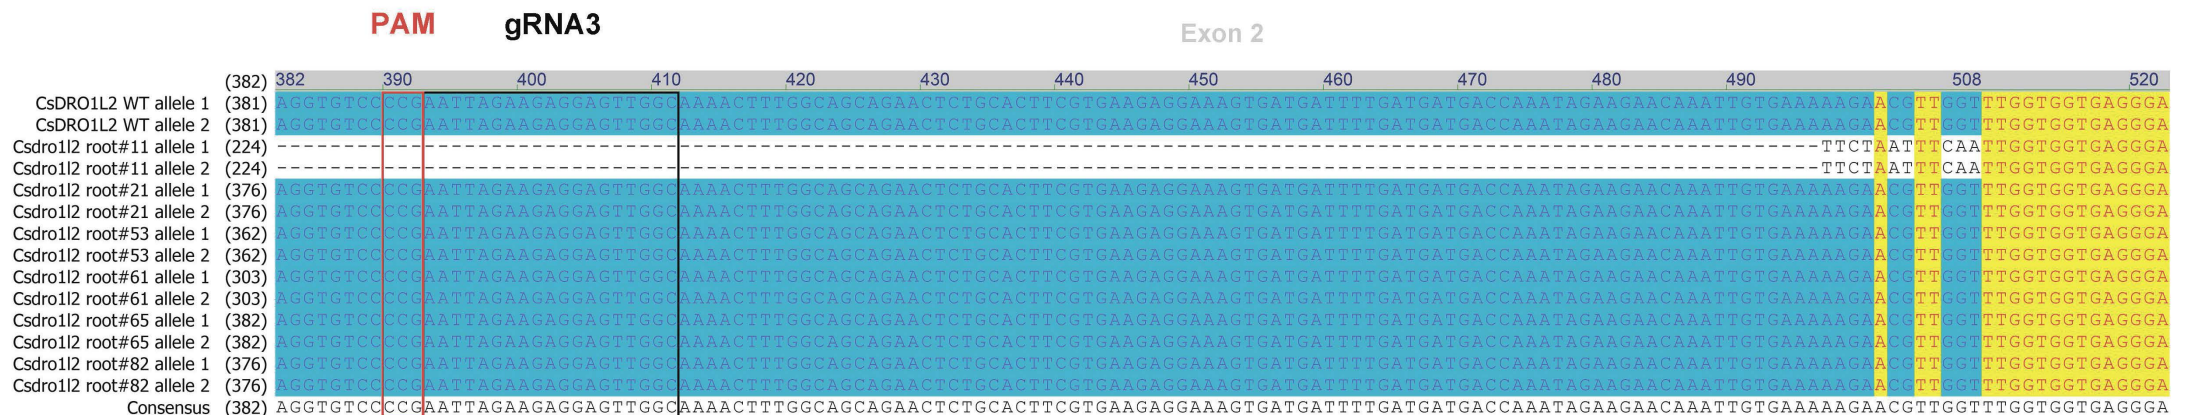

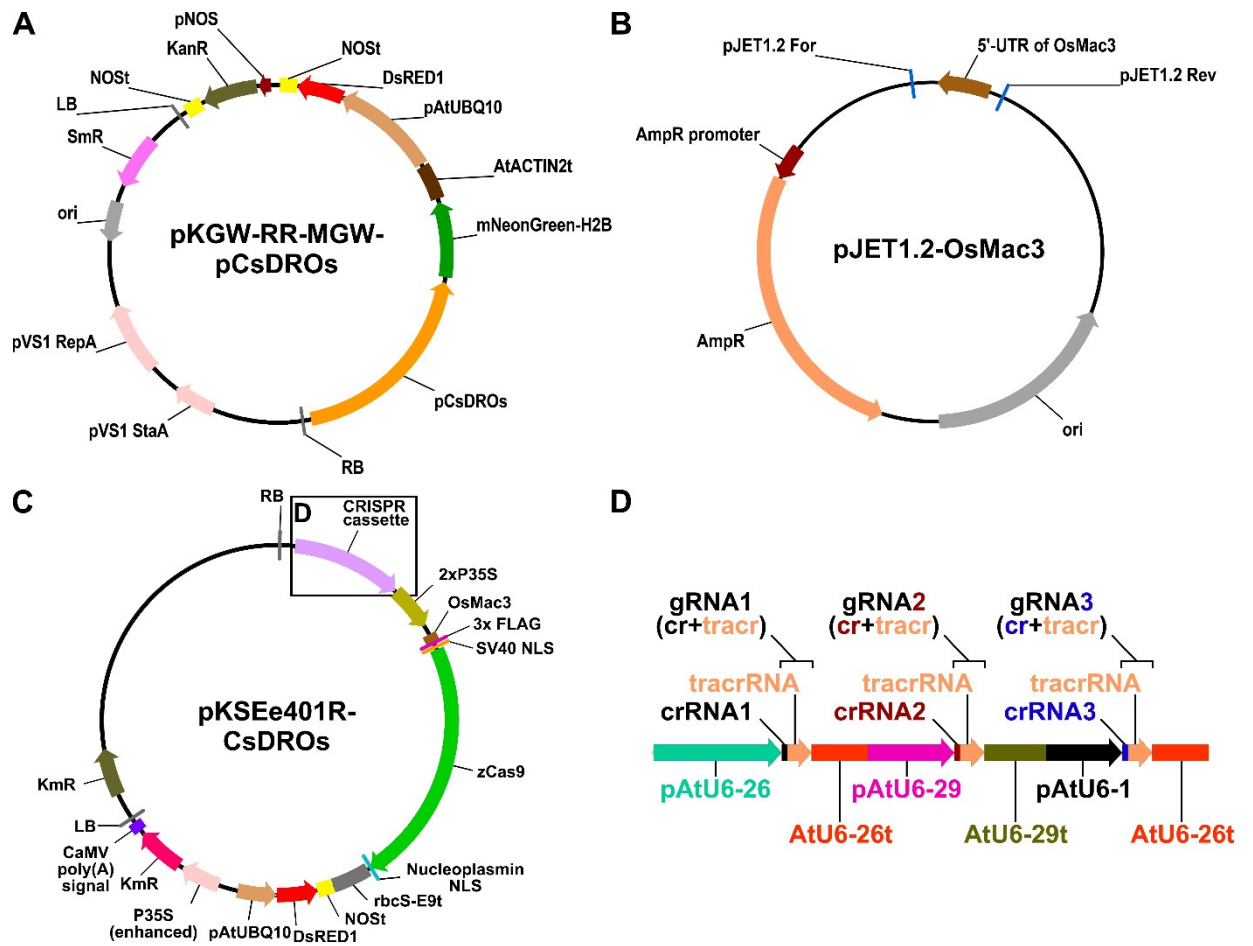

**Figure S8.** Maps of vectors used in this study. (A) Map of the pKGW-RR-MGW binary vector containing the *H2B-mNeonGreen* reporter under control of *CsDRO1*, *CsDRO1-LIKE1*, or *CsDRO1-LIKE2* promoter (*pCsDROs*). (B) Map of the pJET1.2 plasmid harboring the 158-bp 5'-UTR fragment of *OsMac3*. (C) Common map of the binary plasmids for genome editing, pKSEe401R-*CsDRO1*, pKSEe401R-*CsDRO1-LIKE1*, and pKSEe401R-*CsDRO1-LIKE2* (pKSEe401R-*CsDROs*). (D) General scheme of CRISPR cassette consisting of three guide RNA (gRNA)-expressing domains for targeting of each gene *CsDRO1*, *CsDRO1-LIKE1*, or *CsDRO1-LIKE2*. One domain comprises the promoter of the Arabidopsis *U6* small nucleolar RNA (*snoRNA*) gene (*pAtU6-26*, *pAtU6-29*, or *pAtU6-1*), the gRNA sequence (gRNA1, gRNA2, or gRNA3), and the Arabidopsis *U6* *snoRNA* transcription terminator (*AtU6-26t* or *pAtU6-29t*). Each gRNA sequence, in turn, was designed to contain two fused sequences, the 19-bp target specific *crisprRNA* (crRNA1, crRNA2, or crRNA3) and the conservative 80-bp *trans*-activating crRNA (*tracrRNA*). Both pKGW-RR-MGW-pCsDROs (A) and pKSEe401R-*CsDROs* (C) binary vectors carried the *pAtUBQ10-DsRED1-NOST* screening cassette (Limpens et al., 2004) in the backbone.



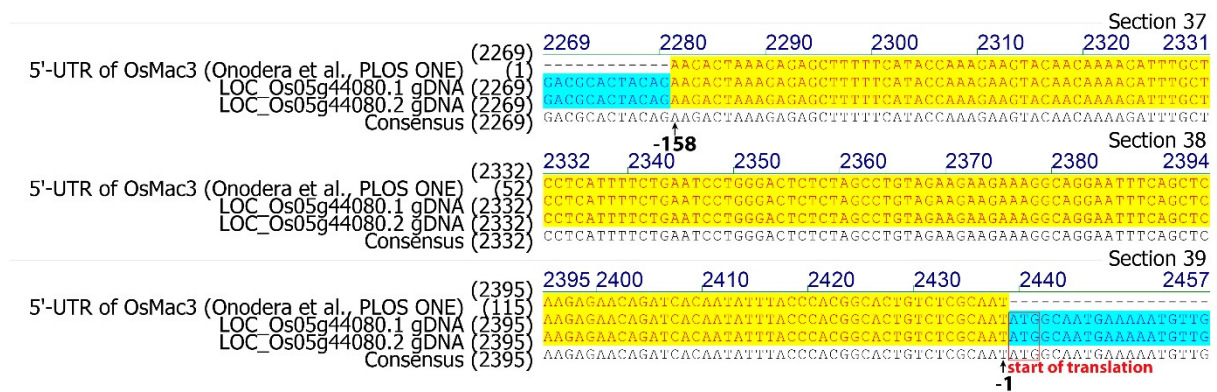

**Figure S9.** Fragment of the nucleotide sequence alignment between 5'-UTRs of LOC\_Os05g44080.1, LOC\_Os05g44080.2 (*Oryza sativa* v7.0 based on Phytozome v13), and 158-bp 5'-UTR fragment (from -158 to -1 b.p. before the ATG) of *OsMac3* from Onodera et al. (2018). The yellow color indicates the similar area between all sequences analyzed. Arrows with numbers indicate the position of the site relative to the translation start, ATG (marked with a red rectangle).

- Limpens, E., Ramos, J., Franken, C., Raz, V., Compaan, B., Franssen, H., et al. (2004). RNA interference in *Agrobacterium rhizogenes*-transformed roots of *Arabidopsis* and *Medicago truncatula*. *J. Exp. Bot.* 55(399), 983-992. doi: 10.1093/jxb/erh122
- Onodera, H., Shingu, S., Ohnuma, M., Horie, T., Kihira, M., Kusano, H., et al. (2018). Establishment of a conditional TALEN system using the translational enhancer dMac3 and an inducible promoter activated by glucocorticoid treatment to increase the frequency of targeted mutagenesis in plants. *PLOS ONE* 13(12), 1-13. doi: 10.1371/journal.pone.0208959



**Table S1.** List of primers used in this study.

| Name                   | Sequence 5'-3'                                              | Application                                                                         |
|------------------------|-------------------------------------------------------------|-------------------------------------------------------------------------------------|
| CsEF1a_qFor            | ATGGGTAAGGAGAAGGTTACATTAACATT                               | RT-qPCR analysis                                                                    |
| CsEF1a_qRev            | CGAACTTCCACAAAGCAATATCAATT                                  |                                                                                     |
| CsDRO1_qFor            | CCATAAAAAACAAGAGTCTCGTGAGGAG                                |                                                                                     |
| CsDRO1_qRev            | GCTTTGTCAATTCTTTCTGTAGTTTACCAA                              |                                                                                     |
| CsDRO1-LIKE1_qFor      | GCAAAAAGAACAACATCAAATTCAATCAA                               |                                                                                     |
| CsDRO1-LIKE1_qRev      | GTGCTTCATTCAGATTCTCGTCTCC                                   |                                                                                     |
| CsDRO1-LIKE2_qFor      | GGATCATATAATTCTTCAAACCTTCAAGT                               |                                                                                     |
| CsDRO1-LIKE2_qRev      | CAAGAGGCAAGGAAGCACTGGA                                      |                                                                                     |
| pCsDRO1_For_XhoI       | AACTCGAGGCATATCAATGGCTCAAATCCAAAAG                          | Promoter cloning into pENTRattL4attR1_BSAI                                          |
| pCsDRO1_Rev_KpnI       | AAAGGTACCTAAATGAAAAAAGAGAATCAAATCCCA                        |                                                                                     |
| pCsDRO1-LIKE1_For_XhoI | AACTCGAGGAGATGTTCTTCCTCAAATCTTCTCGT                         |                                                                                     |
| pCsDRO1-LIKE1_Rev_KpnI | AAAGGTACCTTGTCAAAAGACGGATTGGCAAC                            |                                                                                     |
| pCsDRO1-LIKE2_For_XhoI | AACTCGAGCTTGCTCAGCAACATCACGTATATCA                          |                                                                                     |
| pCsDRO1-LIKE2_Rev_KpnI | AAAGGTACCCAACTCAACAACTGAAACCCAAA                            |                                                                                     |
| OsMac3_For             | AAGACTAAAGAGAGCTTTTCATACCAAAG                               | Cloning of the <i>OsMac3</i> 5'-UTR fragment into pJET1.2 and sequencing            |
| OsMac3_Rev             | ATTGCGAGACAGTGCCGTGG                                        | Fusion <i>OsMac3</i> with <i>zCas9</i> and cloning into pKSE401 via Gibson Assembly |
| OsMac3_For_Gi_XbaI     | CATTACGAACGATACTCGAGTAATCTAGAAAGACTAAAGAGAGCTTTTCATACCAAAG  |                                                                                     |
| OsMac3_Rev_Gi          | CGTGGTCCTTGTAATCCCCGTCGTGGTCTTGTAATCCATATTGCGAGACAGTGCCGTGG |                                                                                     |
| zCas9_For_Gi           | CAATATTTACCCACGGCACTGTCTCGCAATATGGATTACAAAGGACCACGACGG      |                                                                                     |
| zCas9_Rev_Gi_SacI      | ACCGATGATACGAACGAAAGCTCTGAGCTCTCACTTCTTCTTCTCGCCTGCC        |                                                                                     |
| zCas9_Rev1             | CAACAGAGTTAGTCCCAATATCGAGG                                  | Sequencing of the <i>OsMac3</i> - <i>zCas9</i> fusion after Gibson Assembly         |
| zCas9_For2             | ATGGATTACAAGGACCACGACGG                                     |                                                                                     |
| zCas9_Rev2             | CGAGACTTCGAGAGCCTAGCGGA                                     |                                                                                     |
| zCas9_For3             | CATCTGCGGAAGAAGCTCGTGG                                      |                                                                                     |
| zCas9_Rev3             | ATGAATCTGGTGTGGGATGCTGC                                     |                                                                                     |
| zCas9_For4             | CGATCAGTCGAAGAACGGCTACG                                     |                                                                                     |
| zCas9_Rev4             | CTCATTCTCCTCGTTGTCCAGGAAG                                   |                                                                                     |
| zCas9_For5             | ATCGTGGACCTCCTGTTCAAGACC                                    |                                                                                     |
| zCas9_Rev5             | CGTCGTAATCGCTGAGCCTGTTAATAT                                 |                                                                                     |
| zCas9_For6             | AAGCCTGAGAACATCGTCATTGAGAT                                  |                                                                                     |
| zCas9_Rev6             | TCCTCACATCGTAAACCTTGTAGTCCC                                 |                                                                                     |
| zCas9_For7             | GAAGGTCATCACCTGAAGTCAAAGC                                   |                                                                                     |
| zCas9_Rev7             | GCCAGCGGAAGCCAGCA                                           |                                                                                     |
| zCas9_For8             | GGTTCGACAGCCCCACTGTG                                        |                                                                                     |
| zCas9_Rev8             | AGAGCTCTCACTTCTTCTTCTCGCCTGCC                               |                                                                                     |
| pAtUBQ10_For_EcoRI     | AAGAATTCGGGACGAAGTCCAGTAATAAACGG                            | Cloning of the <i>pAtUBQ10</i> - <i>DsRED1</i> - <i>NOS</i> cassette                |
| NOS_Rev_EcoRI          | AAGAATTCGATCTAGTAACATAGATGACACCGCGC                         |                                                                                     |

| Name                        | Sequence 5'-3'                                  | Application                                                                                  |
|-----------------------------|-------------------------------------------------|----------------------------------------------------------------------------------------------|
|                             |                                                 | into pKSEe401 and sequencing                                                                 |
| M13_Rev                     | AACAGCTATGACCATG                                | Sequencing of the <i>pAtUBQ10-DsRED1-NOS</i> cassette after insertion into pKSEe401          |
| pAtUBQ10_Rev                | TGTTAATCAGAAAACTCAGATTAATCTACAAATT              |                                                                                              |
| DsRED1_For                  | ATGGCGCGCTCCTCCAAG                              |                                                                                              |
| DsRED1_REV                  | CAGGAACAGGTGGTGGCGG                             |                                                                                              |
| CsDRO1_g1_DT1_BsaI_F        | ATATATGGTCTCGATTGagaagtgagattgtatccGTT          | Assembly of pKSEe401R-CsDRO1                                                                 |
| CsDRO1_g1_DT1_F0            | TGagaagtgagattgtatccGTTTITAGAGCTAGAAATAGC       |                                                                                              |
| DT0_BsaI_R2                 | ATATTATTGGTCTCAATCTCTTAGTCGACTCTACCAAT          |                                                                                              |
| CsDRO1_g2_DT2_BsaI_F2       | ATATTATTGGTCTCAAGATTGcaattgcaagcaacccatgGTT     | Assembly of pKSEe401R-CsDRO1                                                                 |
| CsDRO1_g2_DT2_F0            | TGcaattgcaagcaacccatgGTTTITAGAGCTAGAAATAGC      |                                                                                              |
| CsDRO1_g3_DT3_R0            | AACccaagcttgagggcagttCAATCACTACTTCGTCTCTAACCAT  |                                                                                              |
| CsDRO1_g3_DT3_BsaI_R        | ATTATTGGTCTCGAAACccaagcttgagggcagttC            |                                                                                              |
| CsDRO1-LIKE1_g1_DT1_BsaI_F  | ATATATGGTCTCGATTGaccagaagaattcagcaacGTT         | Assembly of pKSEe401R-CsDRO1-LIKE1                                                           |
| CsDRO1-LIKE1_g1_DT1_F0      | TGaccagaagaattcagcaacGTTTITAGAGCTAGAAATAGC      |                                                                                              |
| DT0_BsaI_R2                 | the same as for the pKSEe401R-CsDRO1 assembly   |                                                                                              |
| CsDRO1-LIKE1_g2_DT2_BsaI_F2 | ATATTATTGGTCTCAAGATTGtgacttcaaattccaaggtGTT     |                                                                                              |
| CsDRO1-LIKE1_g2_DT2_F0      | TGtgacttcaaattccaaggtGTTTITAGAGCTAGAAATAGC      |                                                                                              |
| CsDRO1-LIKE1_g3_DT3_R0      | AACcctgtgtggttactctcCAATCACTACTTCGTCTCTAACCAT   |                                                                                              |
| CsDRO1-LIKE1_g3_DT3_BsaI_R  | ATTATTGGTCTCGAAACcctgtgtggttactctcC             | Assembly of pKSEe401R-CsDRO1-LIKE2                                                           |
| CsDRO1-LIKE2_g1_DT1_BsaI_F  | ATATATGGTCTCGATTGagcactggattcttcagcGTT          |                                                                                              |
| CsDRO1-LIKE2_g1_DT1_F0      | TGagcactggattcttcagcGTTTITAGAGCTAGAAATAGC       |                                                                                              |
| DT0_BsaI_R2                 | the same as for the pKSEe401R-CsDRO1 assembly   |                                                                                              |
| CsDRO1-LIKE2_g2_DT2_BsaI_F2 | ATATTATTGGTCTCAAGATTGgctagtaaccaagaggcaGTT      |                                                                                              |
| CsDRO1-LIKE2_g2_DT2_F0      | TGgctagtaaccaagaggcaGTTTITAGAGCTAGAAATAGC       |                                                                                              |
| CsDRO1-LIKE2_g3_DT3_R0      | AACaattagaagaggagttggcCAATCACTACTTCGTCTCTAACCAT |                                                                                              |
| CsDRO1-LIKE2_g3_DT3_BsaI_R  | ATTATTGGTCTCGAAACaattagaagaggagttggcC           | Sequencing of the CRISPR-cassettes in pKSEe401R-DRO1, -CsDRO1-LIKE1, and -CsDRO1-LIKE2       |
| M13_For                     | GTA AACGACGGCCAGT                               |                                                                                              |
| AtU6-26p_For                | TGTCCCAGGATTAGAATGATTAGGC                       |                                                                                              |
| AtU6-29p_For                | TTAATCCAACTACTGCAGCCTGAC                        |                                                                                              |
| AtU6-29p_Rev                | AGCCCTCTTCTTTCGATCCATCAAC                       |                                                                                              |
| AtU6-29t_For                | CGTGTTCAGCTCTCATGATCCTTG                        |                                                                                              |
| AtU6-1p_Rev                 | TATGCAAGTCTCACTCACACTCAG                        |                                                                                              |
| CsDRO1_5'-UTR_For           | GTTCTGCTTCGGCATT CATCTTG                        | PCR-amplification of the CsDRO1 ORF and sequencing to search genome editing events within it |
| CsDRO1_3'-UTR_Rev           | ATTTC AAAACAAGGGGTGGAGATTG                      |                                                                                              |
| CsDRO1_Intron1_For          | TGTGCCTTGTTCCTTGTTC                             | Additional primers for sequencing to search genome editing events within the CsDRO1 ORF      |
| CsDRO1_Intron2_Rev          | TGATCTTTAGGATTTAATAATGAATATGCACA                |                                                                                              |
| CsDRO1_Exon2_For            | CTTTTATCTCGAAAACCGAACGCC                        |                                                                                              |
|                             |                                                 |                                                                                              |



| Name                    | Sequence 5'-3'                 | Application                                                                                               |
|-------------------------|--------------------------------|-----------------------------------------------------------------------------------------------------------|
| CsDRO1-LIKE1_5'-UTR_For | TCCCTGTTGCCAATCCGTCTTT         | <b>PCR-amplification of the CsDRO1-LIKE1 ORF</b> and sequencing to search genome editing events within it |
| CsDRO1-LIKE1_3'-UTR_Rev | CCAAGCGAGAAAATAATGTCTTGTGAACT  |                                                                                                           |
| CsDRO1-LIKE2_5'-UTR_For | TTCTGAATAACCCCTTTAATTTTGGTG    | <b>PCR-amplification of the CsDRO1-LIKE2 ORF</b> and sequencing to search genome editing events within it |
| CsDRO1-LIKE2_3'-UTR_Rev | CTATGGCAATAGTTACCTCTCATCTTCATC |                                                                                                           |
| CsDRO1-LIKE2_Exon2_Rev1 | TTCTAATTCGGGGACACCTTCAAG       | Additional primers for sequencing to search genome editing events within the CsDRO1-LIKE2 ORF             |
| CsDRO1-LIKE2_Exon2_For  | TTGGAACCTTTGGCAACAATATTAACG    |                                                                                                           |
| CsDRO1-LIKE2_Exon2_Rev2 | TTTGTCTTCTATTTGGTCATCATCAAAGT  |                                                                                                           |

Restriction enzyme sites in adaptors are underlined and given in **bold** style.

For long primers the primer sequences are separated from adaptors by the gray background.

The target specific *crispr*RNA sequences are given in small letters.
